# Supplementary material
Source: publisher figshare collection journal article supplement (https://gsajournals.figshare.com/ndownloader/files/23728982)
Supplement: Supplementary file 1 [file 23728982]

## Sheet: Sheet1
Common Names	Scientific Names	Protein ID (ENSEMBL or NCBI)
Amazon molly	Poecilia formosa	ENSPFOT00000005947
Anole lizard	Anolis carolinensis	XP_008104657
Cavefish	Astyanax mexicanus	ENSAMXT00000021653
Chicken	Gallus gallus	XP_015132697
Alligator	Alligator sinensis	XP_006016075
Cod	Gadus morhua	ENSGMOT00000009826
Coelacanth	Latimeria chalumnae	XP_005997234.1
Dog	canis lupus familiaris	ENSCAFT00000018359
Frog	Xenopus tropicalis	NP_001096437
Fruit fly	Drosophila melanogaster	Irk3-RD FBtr0343114
Fugu	Takifugu rubripes	ENSTRUT00000004212
Ghost shark	Callorhinchus milii	XP_007887389
Green sea turtle	Chelonia mydas	XP_007052659
Human	Homo sapiens	ENST00000233826
Lamprey	Petromyzon marinus	ENSPMAT00000002611
Medaka	Oryzias latipes	ENSORLT00000012827
Mouse	Mus musculus	ENSMUST00000113212
Platyfish	Xiphophorus maculatus	ENSXMAT00000012178
Rat	Rattus norvegicus	ENSRNOT00000021507
Spotted gar	Lepisosteus oculatus	ENSLOCT00000011223
Stickleback	Gasterosteus aculeatus	ENSGACT00000000530
Tetradon	Tetraodon nigroviridis	ENSTNIT00000009349
Tilapia a	Oreochromis niloticus	ENSONIT00000008455
Tilapia b	Oreochromis niloticus	ENSONIT00000015097
Zebrafish	Danio rerio	ENSDART00000152253
